# Supplementary material
Source: PubMed Central journal article supplement (PMC2999661)

**A**

|               |                                                                                   |   |   |   |   |   |   |
|---------------|-----------------------------------------------------------------------------------|---|---|---|---|---|---|
| IP: VWF       | -                                                                                 | + | + | + | + | + | + |
| IB: ADAMTS-13 |  |   |   |   |   |   |   |
| VWF:          | -                                                                                 | + | + | + | + | + | + |
| rADAMTS-13:   | +                                                                                 | - | - | + | + | + | + |
| Shear stress: | -                                                                                 | - | + | - | + | - | + |
| IAA:          | -                                                                                 | - | - | - | - | + | + |

**B**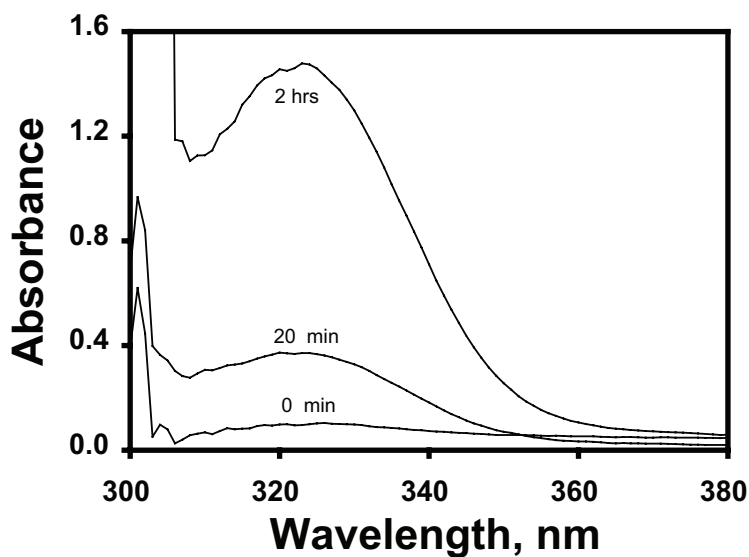**C**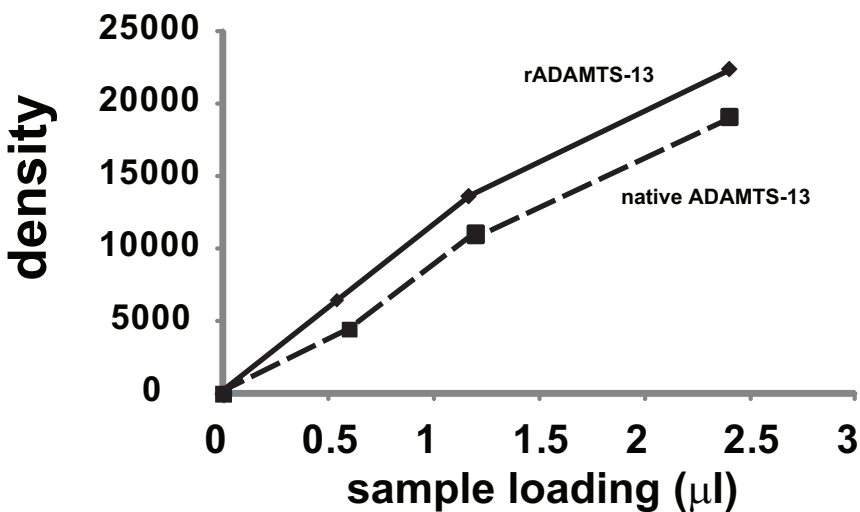

Supplement: NIHMS241948-supplement-Supp_Fig_S1.pdf [file NIHMS241948-supplement-Supp_Fig_S1.pdf]
